# Supplementary material for: Acute effect of three functional fitness training designs with equalized load on inexperienced and experienced athletes
Source: PeerJ. 2025 Apr 30;13:e19265. doi: 10.7717/peerj.19265 (PMC12049098; doi:10.7717/peerj.19265)
Supplement: Supplemental Information 1 [file peerj-13-19265-s001.xlsx]

## Sheet: DB
ID	Sex	Age	Height	Weight	RMPushPress	RatioRMBW	ExPCF	HRMax_TNK	Reps_AM2	Time_FT	RD_EM	HRV_AM2_Pre	HRV_FT_Pre	HRV_EM_Pre	HRV_AM2_Post	HRV_FT_Post	HRV_EM_Post	mmol_AM2_Pre	mmol_FT_Pre	mmol_EM_Pre	mmol_AM2_Post	mmol_FT_Post	mmol_EM_Post	CMJ_AM2_Pre	CMJ_FT_Pre	CMJ_EM_Pre	CMJ_AM2_Post	CMJ_FT_Post	CMJ_EM_Post	CMJ_AM2	CMJ_FT	CMJ_EM	HRmed_AM2	HRmed_FT	HRmed_EM	HRMax_AM2	HRMax_FT	HRMax_EM	RPE_AM2	RPE_FT	RPE_EM
28	H	21	173	68.7	70	1.02	16	193.3	222	719	6	67	61	63	44	39	52	2.9	1.9	2.2	12.7	14.3	9.1	35.5	34.6	32.2	33.4	32.6	32.1	2.1	2	0.1	177	178	166	191	198	192	7	8	5
9	M	31.91	155	59.6	35	0.59	3	185.663	123	690	3.5	73	59	62	69	53	37	2.7	2.4	1.9	10.6	12.2	13.7	27	29.3	28.8	25.6	26.4	25.7	1.4	2.9	3.1	171	177	170	184	188	183	6	8	6
10	M	18.93	170	71.5	42	0.59	8	194.746	159	605	5.5	59	58	62	60	23	31	1.5	1.7	1.4	9	10	11.1	27.9	25.7	26.7	27.1	28.1	26.6	0.8	-2.4	0.1	173	159	160	189	183	180	7	8	9
31	M	30	160	82.4	50	0.61	17	187	153	718	4	70	70	72	50	51	44	1.7	1	1.7	8	6.2	5.2	19.1	19.6	19	18.1	18.1	18.2	1	1.5	0.8	115	141	133	142	152	152	8	7	7
30	M	26	172	69.7	55	0.79	12	189.8	161	710	4	57	57	60	56	42	55	1.4	1.2	1.1	8	10.2	6.1	30.2	28.2	28.4	28.4	28.1	28.1	1.8	0.1	0.3	158	149	154	183	184	180	8	9	7
29	H	26	169	64	70	1.09	15	189.8	215	683	5	58	65	60	42	28	24	2.3	1.7	2.6	9.5	12.3	9.5	42.2	42.6	40.1	42.1	40.9	40	0.1	1.7	0.1	169	160	161	187	183	177	8	8	6
11	H	28.93	162.3	64.3	65	1.01	24	187.746	142	565	3.5	66	71		56	43		2	1.6		11	15.3		36.8	39.7		35.8	34.7		1	5		147	155		162	167		9	9
24	H	27.84	171.1	74.2	75	1.01	18	188.512	187	697	5	50	53	56	44	20	15	2.3	2.8	3.7	17.1	13	14.5	46.1	48.4	48.2	41.7	43.3	43	4.4	5.1	5.2	158	155	160	167	171	170	8	7	6
6	H	34.84	196.3	117.2	92	0.78	24	183.611	148	695	4	74	59	78	65	32	31	3.1	3	2.5	14.3	12.7	9.5	36.4	39.8	37.9	35.5	39	37	0.9	0.8	0.9	168	173	173	183	188	187	8	7	8
13	H	33.21	183.6	77.4	72.5	0.94	24	184.753	166	660	4.5	50	52	47	26	21	36	2.3	1.1	3	11.2	10.4	8.8	41	41.7	39.6	41.1	41.7	41.4	-0.1	0	-1.8	168	161	159	180	177	175	7	8	7
21	M	29.1	160	55.72	40	0.72	24	187.63	145	655	4	76	72	64	37	40	44	2.1	2	1.8	6.9	7.7	6.3	25.4	25	23	24.4	24.5	26.4	1	0.5	-3.4	170	171	168	182	187	189	6	7	7
26	M	29	173	66.7	55	0.82	24	187.7	155	634	5	52	59	64	45	54	22	3.1	2	0.6	13.1	14.4	8.7	29.6	29.3	29.6	27.7	24.2	27	1.9	5.1	2.6	167	170	176	185	188	188	7	9	7
27	M	39	159	67.3	47	0.7	24	180.7	148	683	4	52	47	74	42	27	43	2.9	1.6	1.2	9.2	16.9	7.6	28.2	27.4	26.8	25.7	26.1	24.1	2.5	1.3	2.7	161	163	162	180	180	180	8	9	9
3	H	26.09	169	69	85	1.23	27	189.735	178	681	6	63	43		69	40		2.3	2.1		4.8	5.1		39.8	39.3		37.8	39.1		2	0.2		165	167		177	181		6	6
8	H	34.02	176	77.1	85	1.1	30	184.187	180	668	5	68	58	73	23	21	28	3.6	2.3	2.4	9.9	11.6	6.6	36.3	33.8	38.4	34.3	36.7	36.4	2	-2.9	2	180	181	168	189	189	183	8	9	6
25	M	22	159	54	60	1.11	35	192.6	148	712	4	76	73	74	57	45	39	2.6	2.1	0.7	6.7	6.8	6.2	35.8	34.1	35.4	34.7	34	32.9	1.1	0.1	2.5	174	183	178	190	200	194	9	10	9
7	H	36.9	177.6	80.5	85	1.06	72	182.171	179	700	4.5	81	56	51	24	45	25	2.8	3.1	2.7	11.9	14.5	12.5	35	37	35.6	34.2	35.9	38	0.8	1.1	-2.4	164	176	162	177	186	178	8	8	6
16	H	44.45	177.5	93	95	1.02	114	176.885	185	690	5	43	45	51	53	22	16	2.3	2.1	2	10	11.1	5.6	42.8	43.7	43	40.7	41.7	42.4	2.1	2	0.6	166	167	162	176	181	177	8	9	7
20	H	39.5	167.1	73	75	1.03	72	180.35	187	680	5	60	58	53	22	40	27	2.1	1.6	2.1	8.3	12.3	6.4	36.3	38.9	36.8	36	36.8	36.4	0.3	2.1	0.4	166	152	159	171	173	176	5	6	5
18	H	50.15	185.6	87.1	80	0.92	36	172.895	154	620	4	58	65	66	48	50	50	3.5	3.1	3.7	7.7	12.6	7.5	37.6	36.4	38.2	36.4	36.1	36	1.2	0.3	2.2	155	153	152	167	165	167	8	8	6
22	H	40.55	173.3	78.9	60	0.76	84	179.615	169	662	4.5	59	59	62	25	33	40	3	2.5	2.9	9.7	6.5	6.5	36.3	37.6	42	39.8	37.7	37.4	-3.5	-0.1	4.6	162	158	149	171	170	168	6	7	6
14	M	42.81	159.6	62.1	60	0.97	156	178.033	219	718	6	62	55	56	46	21	24	1.6	1.4	1.7	12	10.3	4.5	43.1	42.1	37.9	40.7	40.5	38.9	2.4	1.6	-1	181	182	185	194	194	200	7	8	7
17	M	40.3	158.1	55.1	52.5	0.95	60	179.79	182	655	5	70	58	75	46	31	29	3.4	2.5	2.6	9.4	11.8	12.7	33.3	34.3	37.6	30.2	34.2	35	3.1	0.1	2.6	168	160	164	177	175	175	7	7	7
19	M	41.63	165.4	65.4	55	0.84	78	178.859	184	680	5	71	65		23	24		2.4	1.7		8.2	7.4		27.1	27.2		27.2	25.9		-0.1	1.3		153	148		169	169		6	7
1	H	47.47	180.9	90.9	100	1.1	36	174.772	179	705	5.5	67	66	69	15	14	19	2.2	1.9	1.7	13.7	9.6	9.4	40.3	44.3	40.9	38	40.1	40	2.3	4.2	0.9	172	174	165	192	189	182	7	8	6
5	H	31.78	173.9	74.2	84	1.13	60	185.753	211	669	6.5	60	58	75	58	13	18	1.4	4.7	1.6	10.2	13.6	6.1	40.3	42.8	42.38	38.6	45.2	43	1.7	-2.4	-0.62	178	183	171	197	194	193	8	8	6
15	H	41.9	170.1	68.8	80	1.16	96	178.67	189	645	5	43	59	57	46	23	32	1.9	2.1	3.1	16.5	20.7	11.1	42.2	43.5	39.6	39.7	40.5	39.6	2.5	3	0	153	151	143	162	160	159	6	8	5
23	H	37.3	169	72.6	90	1.24	100	181.89	188	673	5	53	51	61	36	39	29	1.6	3.4	2.3	13.4	16.7	10.4	37.8	37.1	34.6	33.3	34	35	4.5	3.1	-0.4	155	162	154	166	171	169	8	9	7
